# Supplementary material
Source: PubMed Central journal article supplement (PMC1413794)

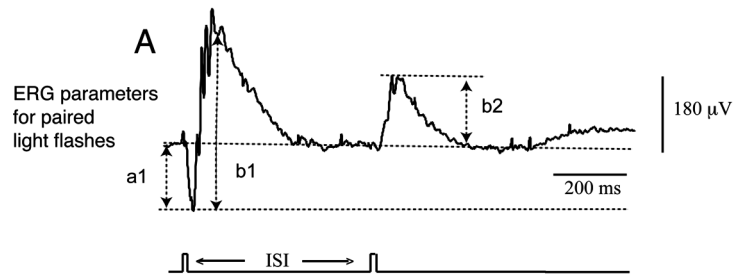

Representative b2 traces

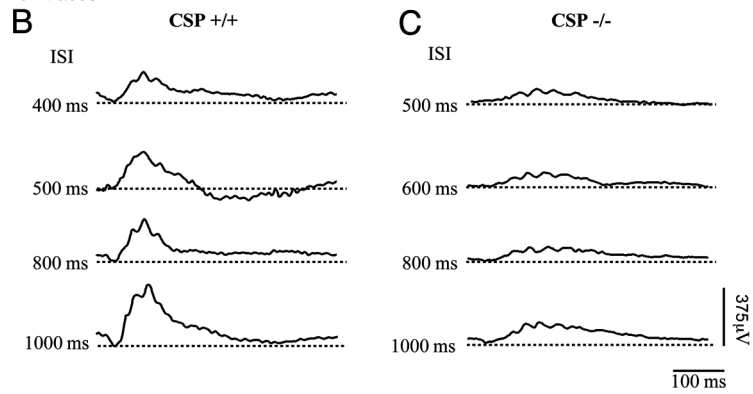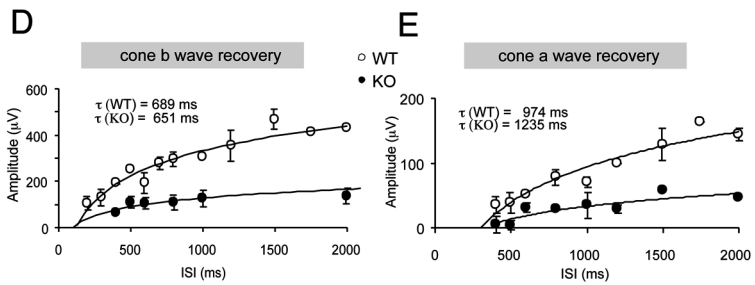

Supplement: pnas_0510060103_1.pdf [file pnas_0510060103_1.pdf]

**CSP $\alpha$ <sup>+/+</sup>**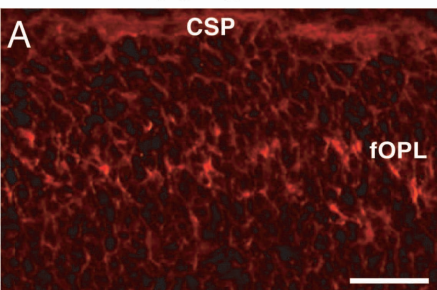**CSP $\alpha$ <sup>-/-</sup>**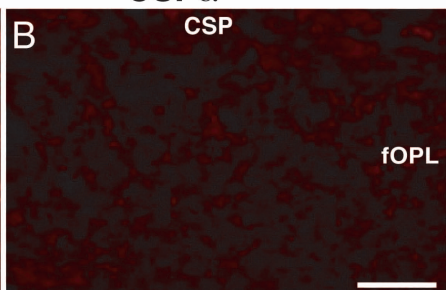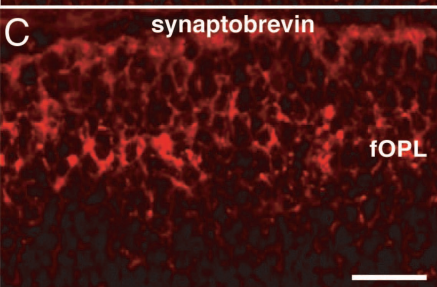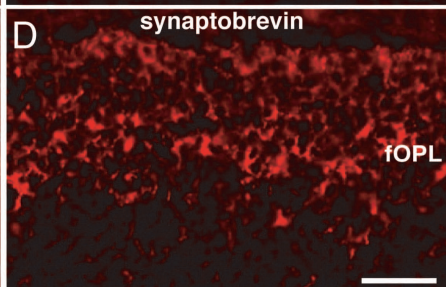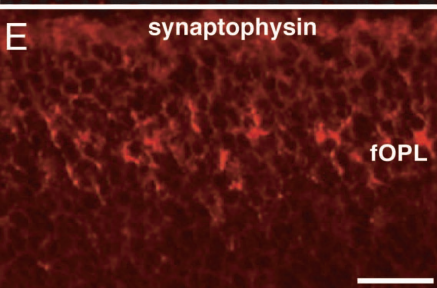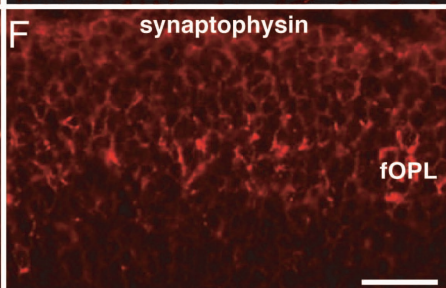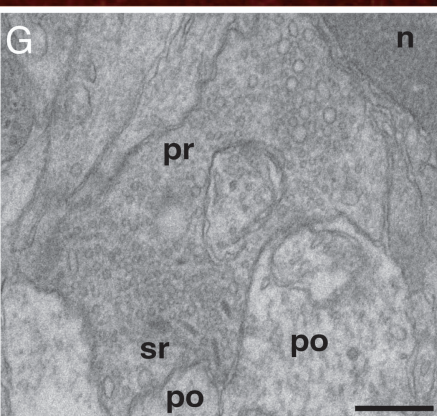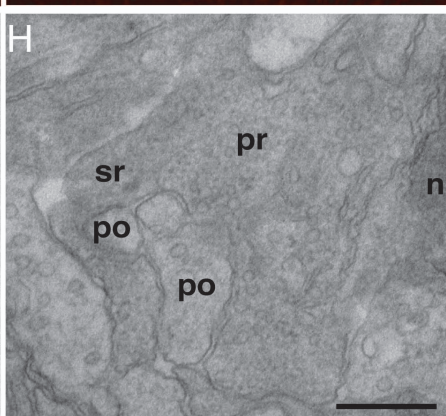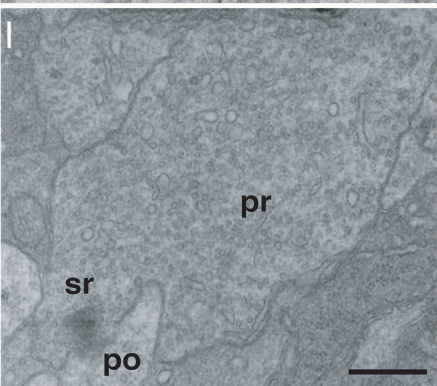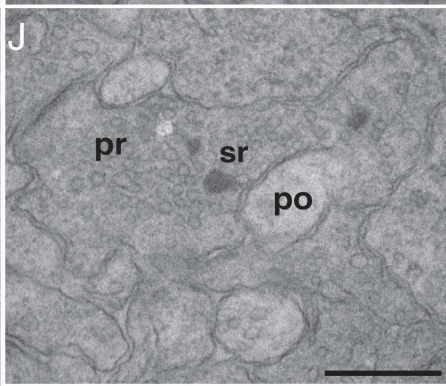

Supplement: pnas_0510060103_2.pdf [file pnas_0510060103_2.pdf]

**CSP $\alpha$ <sup>+/+</sup>**

synaptobrevin

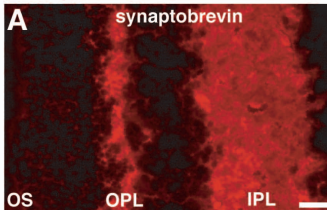**CSP $\alpha$ <sup>-/-</sup>**

synaptobrevin

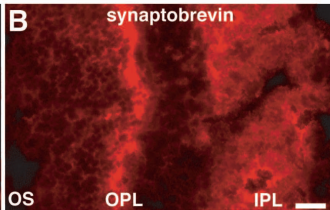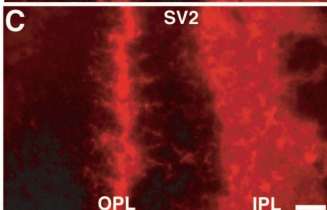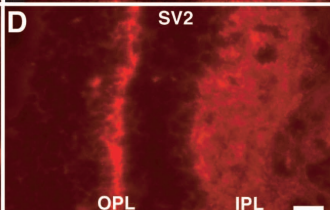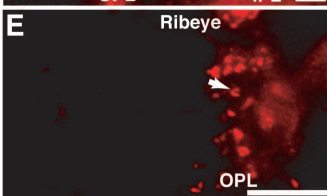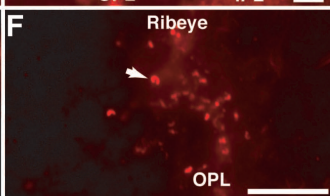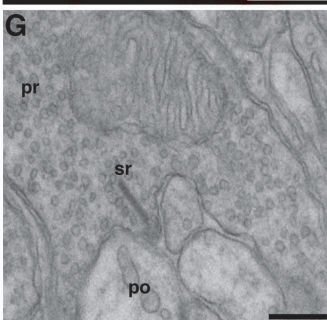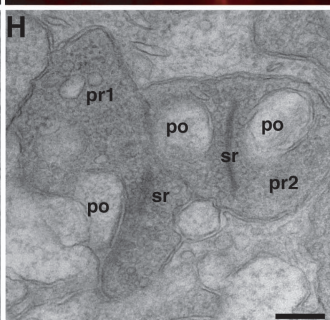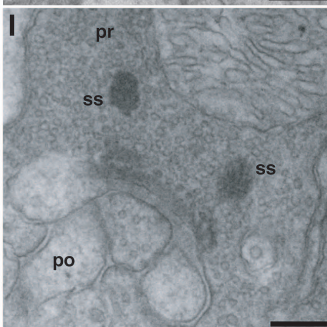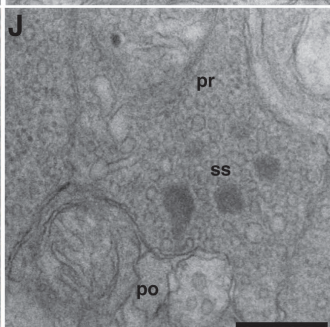

Supplement: pnas_0510060103_3.pdf [file pnas_0510060103_3.pdf]

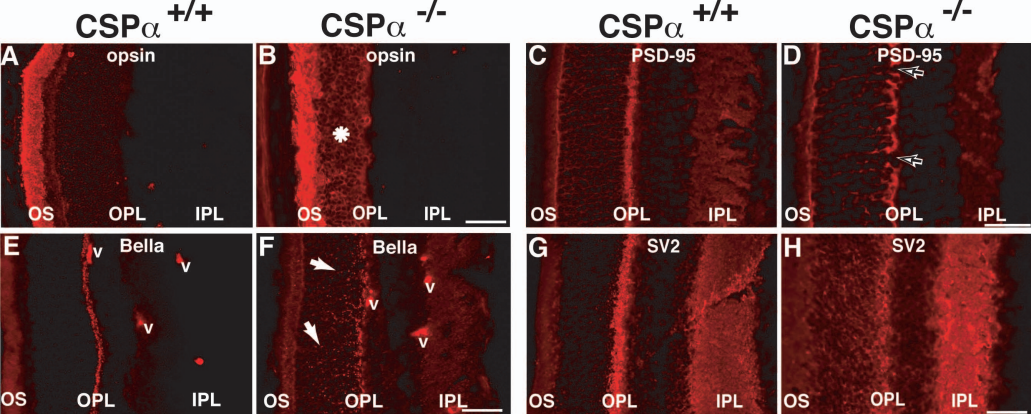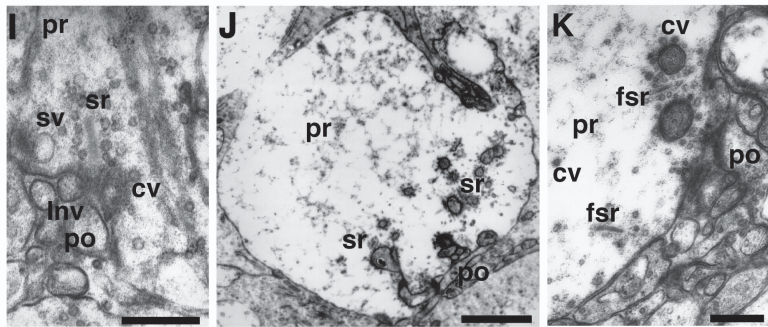

Supplement: pnas_0510060103_4.pdf [file pnas_0510060103_4.pdf]

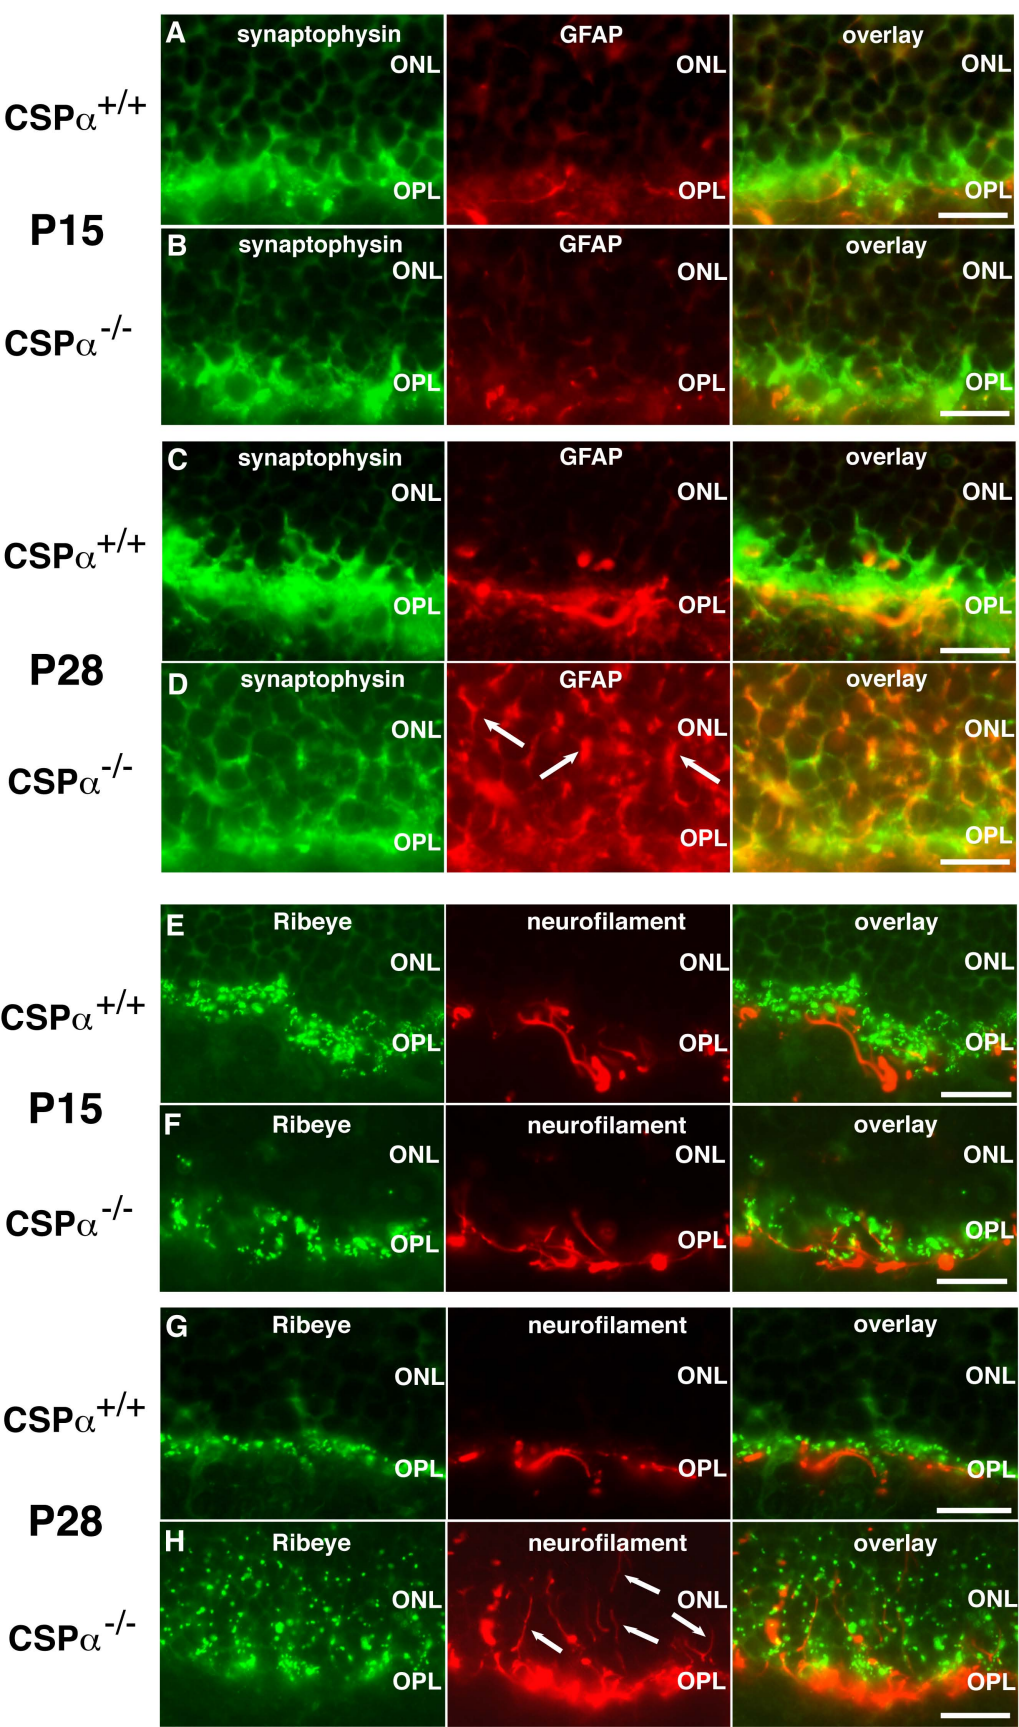

Supplement: pnas_0510060103_5.pdf [file pnas_0510060103_5.pdf]

**CSP $\alpha$ <sup>+/+</sup>**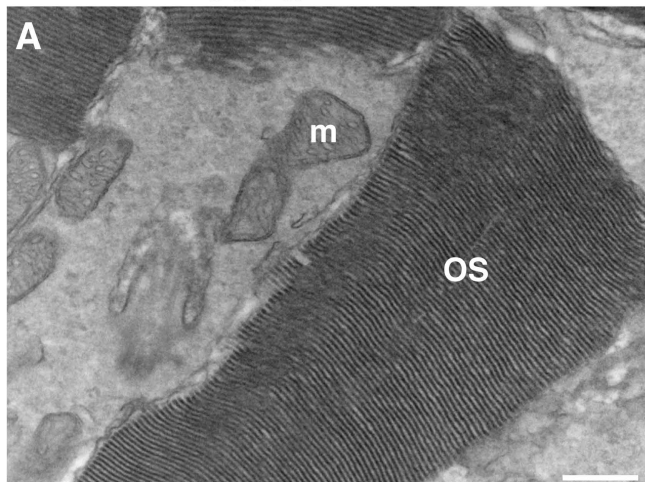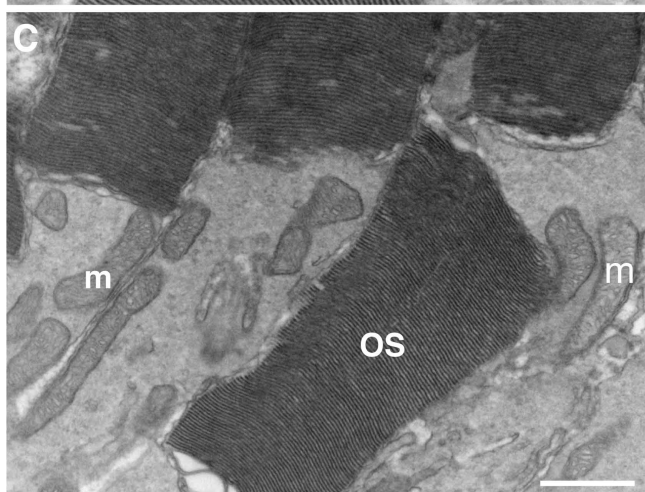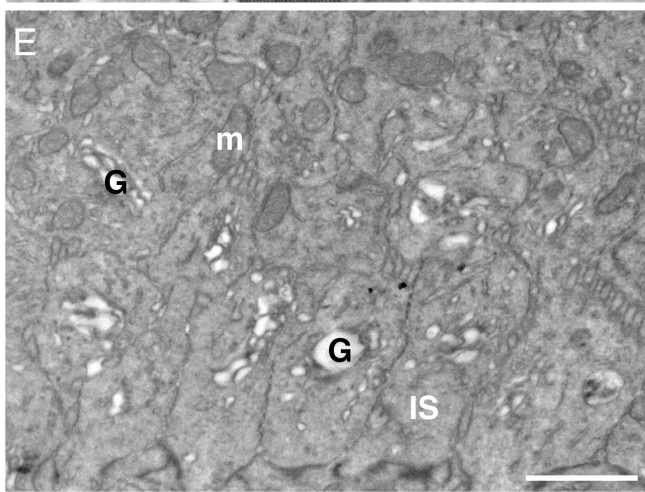**CSP $\alpha$ <sup>-/-</sup>**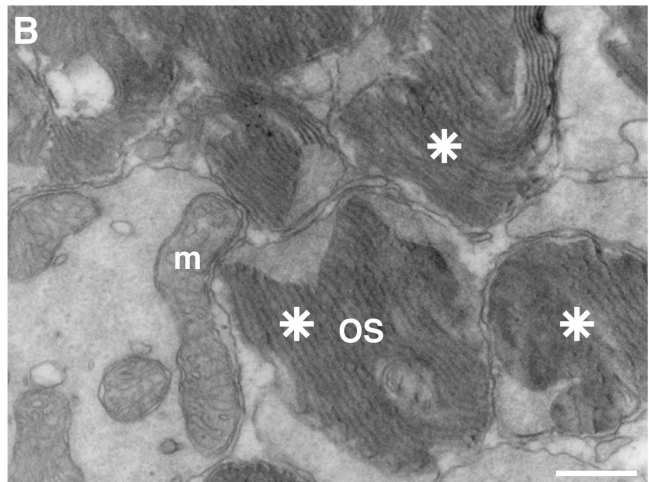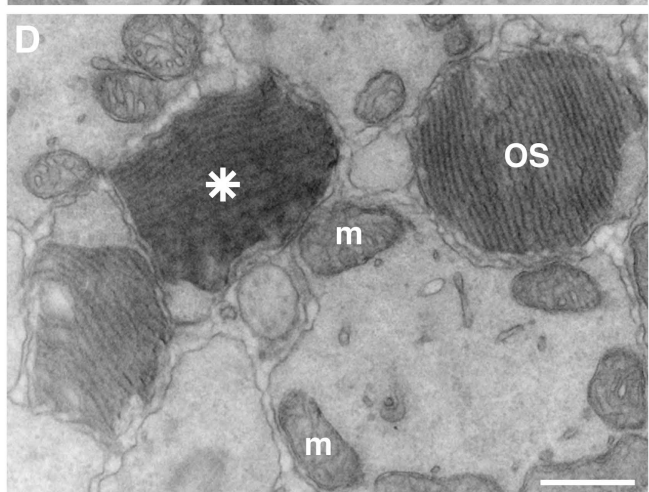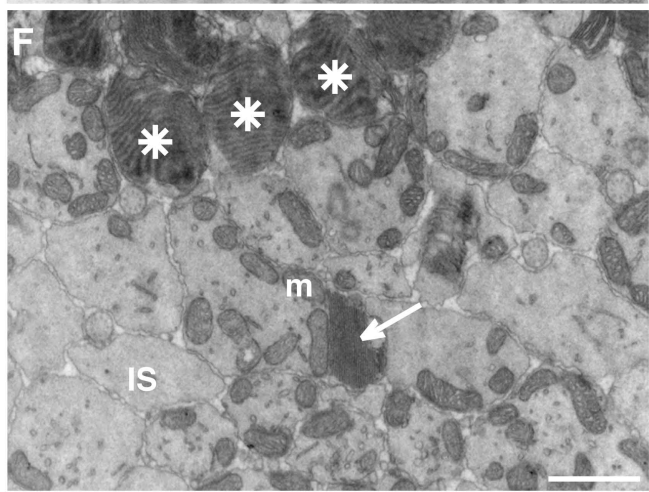

Supplement: pnas_0510060103_6.pdf [file pnas_0510060103_6.pdf]

**A**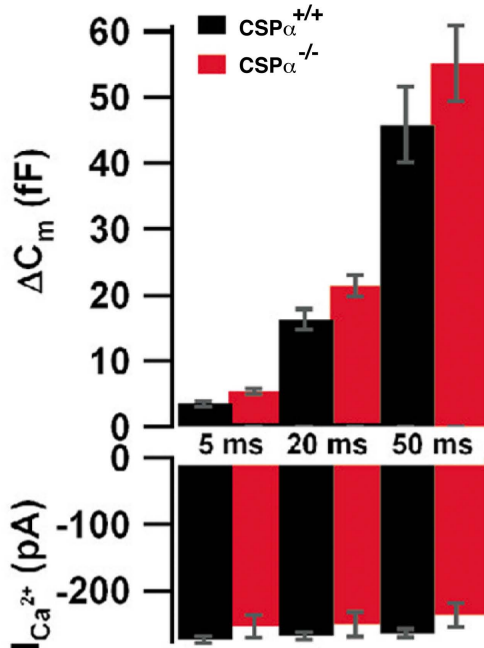**B**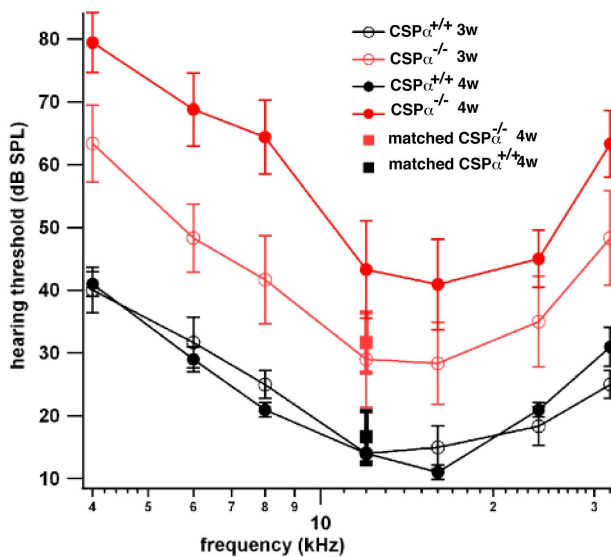**C**

|     | latency (ms)    | p               |        |
|-----|-----------------|-----------------|--------|
|     | $+/+$           | $-/-$           |        |
| I   | $1.26 \pm 0.03$ | $1.42 \pm 0.03$ | 0.002  |
| II  | $2.10 \pm 0.03$ | $2.36 \pm 0.03$ | <0.001 |
| III | $2.92 \pm 0.03$ | $3.30 \pm 0.06$ | <0.001 |
| IV  | $3.90 \pm 0.04$ | $4.25 \pm 0.09$ | 0.006  |
| V   | $4.98 \pm 0.08$ | $5.57 \pm 0.11$ | 0.001  |

**D**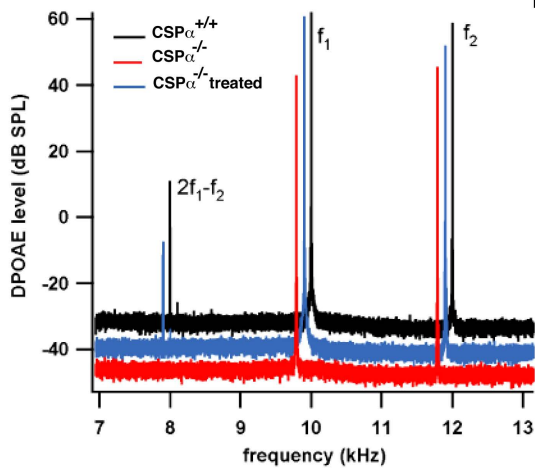**E**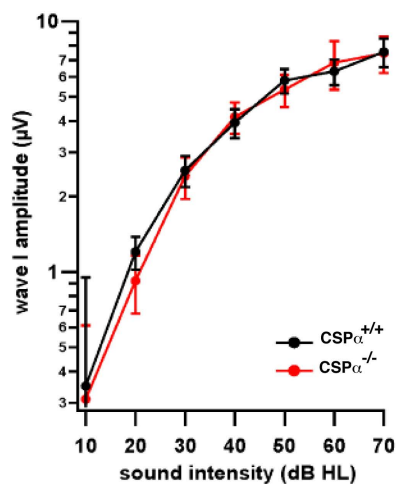

Supplement: pnas_0510060103_7.pdf [file pnas_0510060103_7.pdf]

CSP  
genotype

$+/+$

$+/-$

$-/-$

CSP →

SNAP25 →

Syb2 →

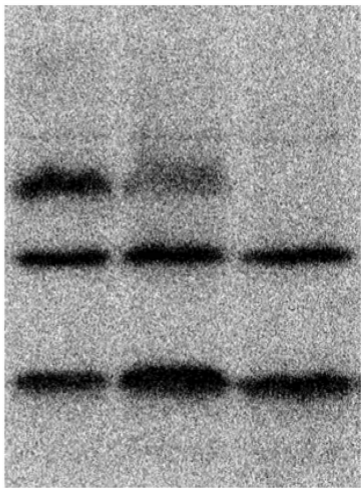

Supplement: pnas_0510060103_8.pdf [file pnas_0510060103_8.pdf]

**CSP $\alpha$  <sup>+/+</sup>**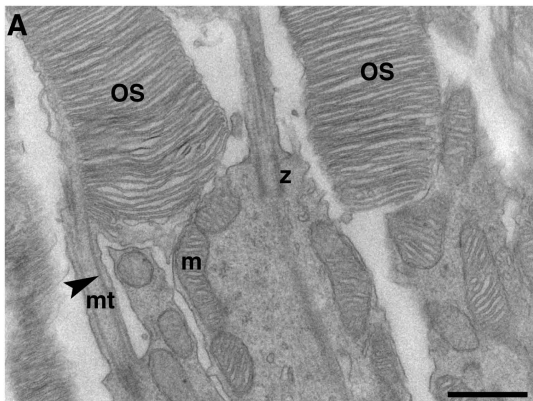**CSP $\alpha$  <sup>-/-</sup>**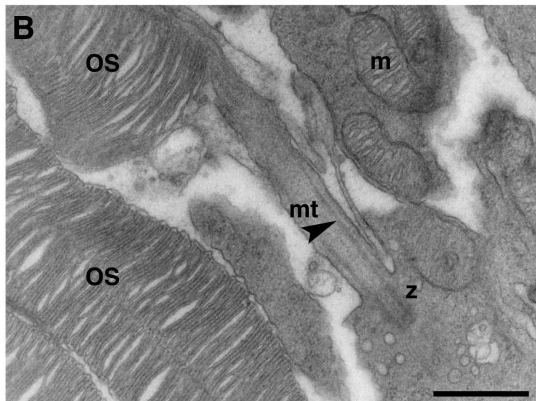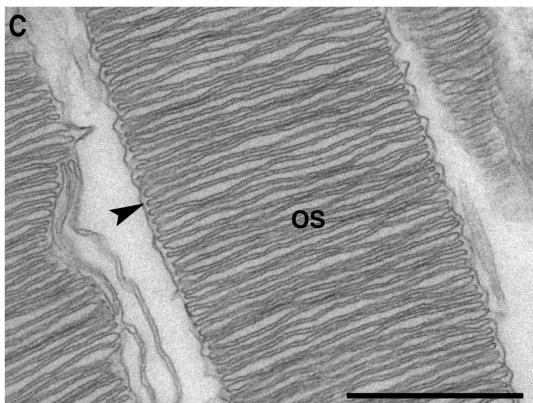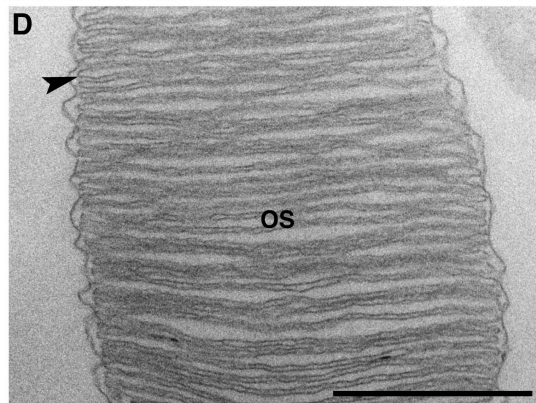**CSP $\alpha$  <sup>+/+</sup>**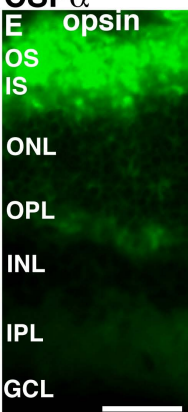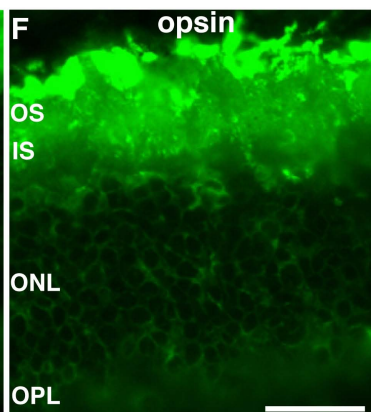**CSP $\alpha$  <sup>-/-</sup>**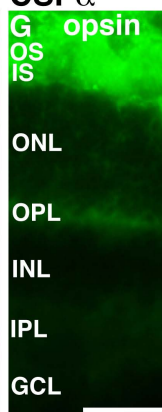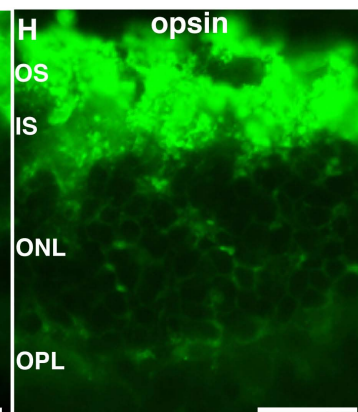

Supplement: pnas_0510060103_9.pdf [file pnas_0510060103_9.pdf]
